# Supplementary material
Source: PubMed Central journal article supplement (PMC9067300)
Supplement: mmc1.pdf [file mmc1.pdf]

# Variation in Communication and Family Visiting Policies in Intensive Care within and between Countries During the Covid-19 Pandemic: The COVISIT International Survey

Electronic supplement

## Contents

|                                                                                                           |    |
|-----------------------------------------------------------------------------------------------------------|----|
| Figure esup-1: Flowchart of the COVISIT survey.....                                                       | 2  |
| Table esup-1: Characteristics of the ICUs across geographical regions .....                               | 3  |
| Table esup-1 cont'd.....                                                                                  | 4  |
| Table esup-2 Visiting hours in participating ICUs across geographical regions .....                       | 5  |
| Table esup-2 cont'd.....                                                                                  | 6  |
| Table esup-3: Visitor policies in participating ICUs across geographical regions at time of survey.....   | 7  |
| Table esup-3 cont'd.....                                                                                  | 8  |
| Table esup-4: Communication and support for relatives across geographical regions at time of survey ..... | 9  |
| Table esup-4 cont'd.....                                                                                  | 10 |
| Figure esup-2 map of participating countries.....                                                         | 11 |
| Data collection tool .....                                                                                | 12 |

Figure esup-1: Flowchart of the COVISIT survey.

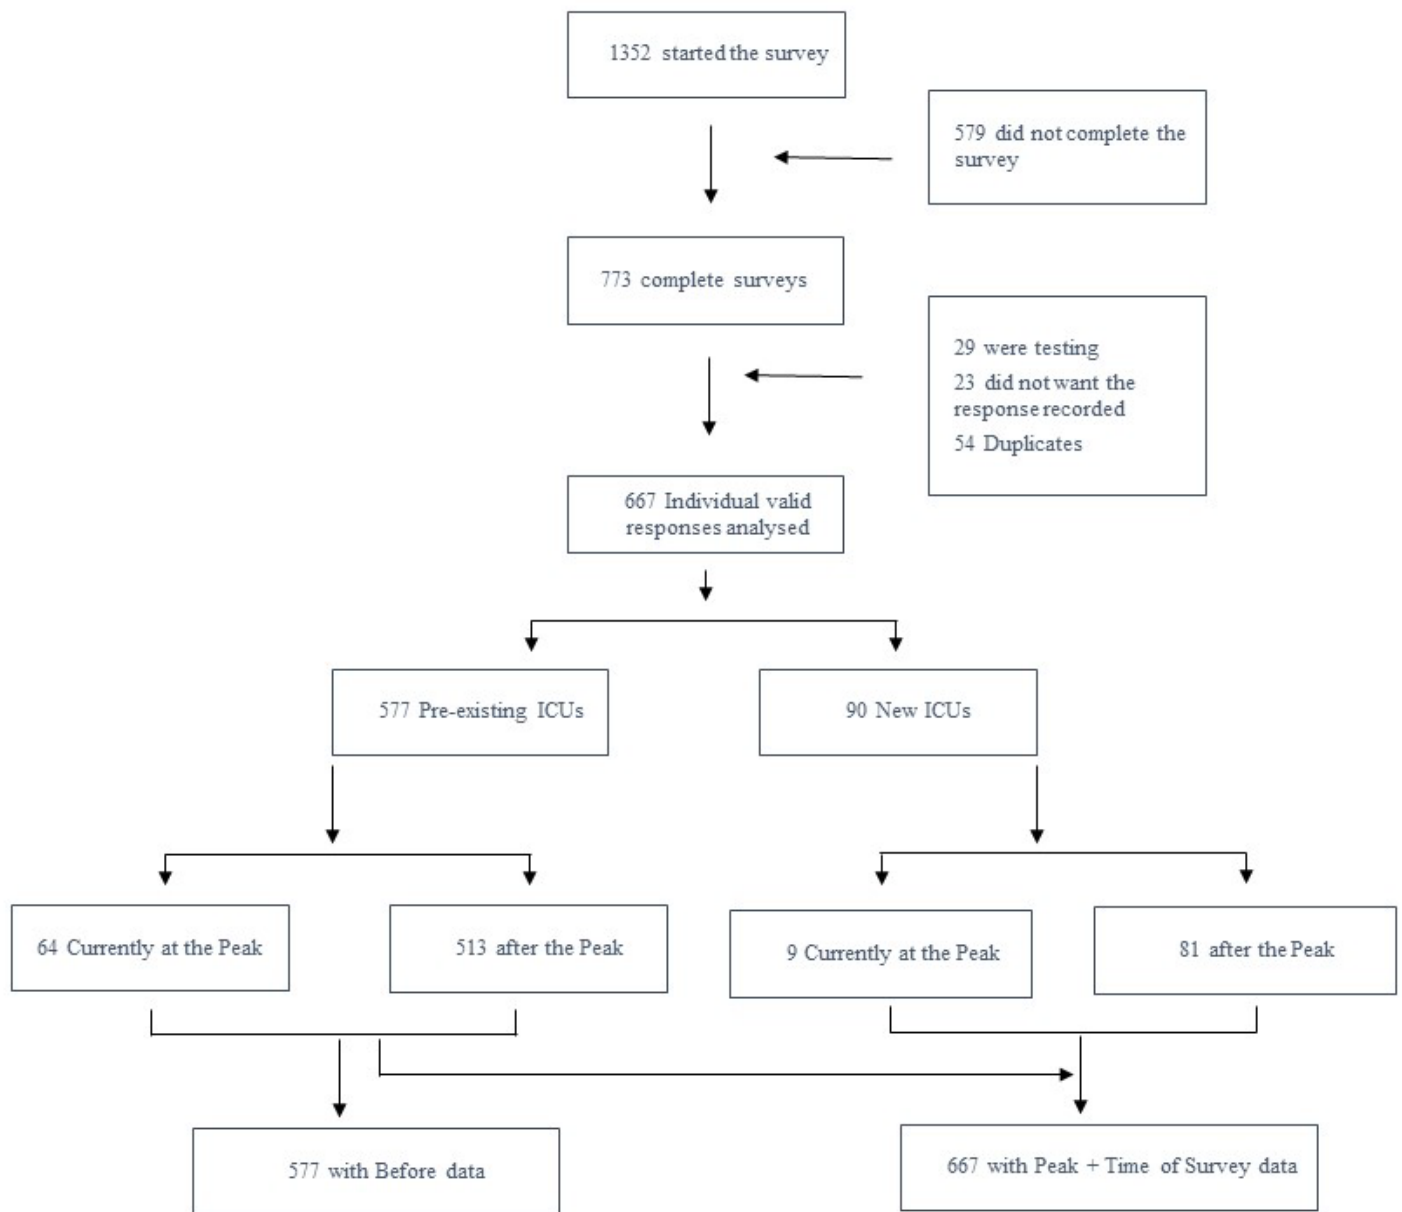

Footnotes: Pre-existing ICU is defined as existing before the COVID-19 pandemic and new is defined as built specifically for the COVID-19 pandemic. Before is defined as before the COVID-19 pandemic, at peak is defined as the time with the highest number of COVID-19 patients in the ICU and at time of survey is defined as the time of completing the survey. Respondents working in ICUs that were specifically created for the COVID-19 pandemic did not provide 'before' data. For ICUs that were at the peak at the time of survey response, peak data is equal to time of survey.



Table esup-1 cont'd

| Variable                                   | Total    | East Asia and Pacific | Europe and Central Asia | Latin America and the Caribbean | Middle East and North Africa | North America | South Asia | Sub-Saharan Africa |
|--------------------------------------------|----------|-----------------------|-------------------------|---------------------------------|------------------------------|---------------|------------|--------------------|
|                                            | n (%)    | n (%)                 | n (%)                   | n (%)                           | n (%)                        | n (%)         | n (%)      | n (%)              |
| Total number of ICU beds at time of survey | n=658    | n=100                 | n=341                   | n=47                            | n=114                        | n=11          | n=18       | n=27               |
| 1 to 8                                     | 152 (23) | 35 (35)               | 59 (17)                 | 9 (19)                          | 33 (29)                      | 0 (0)         | 4 (22)     | 12 (44)            |
| 9 to 16                                    | 221 (34) | 38 (38)               | 127 (37)                | 9 (19)                          | 37 (32)                      | 3 (27)        | 3 (17)     | 4 (15)             |
| 17 to 24                                   | 112 (17) | 11 (11)               | 61 (18)                 | 10 (21)                         | 24 (21)                      | 2 (18)        | 3 (17)     | 1 (4)              |
| 25 to 40                                   | 92 (14)  | 12 (12)               | 55 (16)                 | 6 (13)                          | 12 (11)                      | 2 (18)        | 5 (28)     | 0 (0)              |
| >40                                        | 81 (12)  | 4 (4)                 | 39 (11)                 | 13 (28)                         | 8 (7)                        | 4 (36)        | 3 (17)     | 10 (37)            |
| Nurse to patient ratio before COVID-19     | n=442    | n=88                  | n=265                   | n=27                            | n=34                         | n=9           | n=12       | n=7                |
| 1:1                                        | 77 (17)  | 28 (32)               | 29 (11)                 | 5 (19)                          | 4 (12)                       | 6 (67)        | 3 (25)     | 2 (29)             |
| 1:2                                        | 211 (48) | 54 (61)               | 119 (45)                | 7 (26)                          | 18 (53)                      | 3 (33)        | 8 (67)     | 2 (29)             |
| 1:3                                        | 122 (28) | 3 (3)                 | 105 (40)                | 4 (15)                          | 8 (24)                       | 0 (0)         | 1 (8)      | 1 (14)             |
| >1:3                                       | 32 (7)   | 3 (3)                 | 12 (5)                  | 11 (41)                         | 4 (12)                       | 0 (0)         | 0 (0)      | 2 (29)             |
| Nurse patient ratio at peak                | n=561    | n=96                  | n=322                   | n=42                            | n=66                         | n=10          | n=15       | n=10               |
| 1:1                                        | 86 (15)  | 37 (39)               | 26 (8)                  | 2 (5)                           | 7 (11)                       | 8 (80)        | 3 (20)     | 3 (30)             |
| 1:2                                        | 244 (43) | 53 (55)               | 141 (44)                | 13 (31)                         | 27 (41)                      | 1 (10)        | 6 (40)     | 3 (30)             |
| 1:3                                        | 145 (26) | 5 (5)                 | 112 (35)                | 5 (12)                          | 18 (27)                      | 1 (10)        | 2 (13)     | 2 (20)             |
| >1:3                                       | 86 (15)  | 1 (1)                 | 43 (13)                 | 22 (52)                         | 14 (21)                      | 0 (0)         | 4 (27)     | 2 (20)             |
| Nurse to patient ratio at time of survey   | n=555    | n=96                  | n=318                   | n=41                            | n=65                         | n=10          | n=15       | n=10               |
| 1:1                                        | 86 (15)  | 34 (35)               | 28 (9)                  | 5 (12)                          | 5 (8)                        | 7 (70)        | 4 (27)     | 3 (30)             |
| 1:2                                        | 256 (46) | 54 (56)               | 158 (50)                | 9 (22)                          | 22 (34)                      | 3 (30)        | 8 (53)     | 2 (20)             |
| 1:3                                        | 146 (26) | 5 (5)                 | 113 (36)                | 5 (12)                          | 19 (29)                      | 0 (0)         | 1 (7)      | 3 (30)             |
| >1:3                                       | 67 (12)  | 3 (3)                 | 19 (6)                  | 22 (54)                         | 19 (29)                      | 0 (0)         | 2 (13)     | 2 (20)             |

Table esup-2 Visiting hours in participating ICUs across geographical regions

| Variable                                                    | Total      | East Asia and Pacific | Europe and Central Asia | Latin America and the Caribbean | Middle East and North Africa | North America | South Asia | Sub-Saharan Africa |
|-------------------------------------------------------------|------------|-----------------------|-------------------------|---------------------------------|------------------------------|---------------|------------|--------------------|
|                                                             | n (%)      | n (%)                 | n (%)                   | n (%)                           | n (%)                        | n (%)         | n (%)      | n (%)              |
| Visiting hours before COVID19                               | n=525      | n=91                  | n=284                   | n=30                            | n=72                         | n=10          | n=13       | n=25               |
| No in-person visiting                                       | 30 (5.7)   | 11 (12.1)             | 9 (3.2)                 | 1 (3.3)                         | 8 (11.1)                     | 0 (0.0)       | 0 (0.0)    | 1 (4.0)            |
| Less than 30 minutes                                        | 79 (15.0)  | 19 (20.9)             | 31 (10.9)               | 0 (0.0)                         | 22 (30.6)                    | 0 (0.0)       | 2 (15.4)   | 5 (20.0)           |
| 30 to 60 minutes                                            | 86 (16.4)  | 11 (12.1)             | 36 (12.7)               | 8 (26.7)                        | 15 (20.8)                    | 2 (20.0)      | 5 (38.5)   | 9 (36.0)           |
| 1 hour                                                      | 52 (9.9)   | 6 (6.6)               | 26 (9.2)                | 4 (13.3)                        | 8 (11.1)                     | 0 (0.0)       | 2 (15.4)   | 6 (24.0)           |
| 2 hours or more                                             | 172 (32.8) | 21 (23.1)             | 121 (42.6)              | 11 (36.7)                       | 12 (16.7)                    | 0 (0.0)       | 4 (30.8)   | 3 (12.0)           |
| Unrestricted visiting hours                                 | 106 (20.2) | 23 (25.3)             | 61 (21.5)               | 6 (20.0)                        | 7 (9.7)                      | 8 (80.0)      | 0 (0.0)    | 1 (4.0)            |
| Visiting hours COVID-19 patients at peak                    | n=667      | n=100                 | n=344                   | n=48                            | n=118                        | n=11          | n=18       | n=28               |
| No in-person visiting                                       | 558 (83.7) | 93 (93.0)             | 296 (86.0)              | 39 (81.3)                       | 84 (71.2)                    | 7 (63.6)      | 14 (77.8)  | 25 (89.3)          |
| Less than 30 minutes                                        | 35 (5.2)   | 5 (5.0)               | 11 (3.2)                | 2 (4.2)                         | 14 (11.9)                    | 0 (0.0)       | 1 (5.6)    | 2 (7.1)            |
| 30 to 60 minutes                                            | 26 (3.9)   | 0 (0.0)               | 13 (3.8)                | 6 (12.5)                        | 4 (3.4)                      | 1 (9.1)       | 2 (11.1)   | 0 (0.0)            |
| 1 hour                                                      | 18 (2.7)   | 2 (2.0)               | 12 (3.5)                | 0 (0.0)                         | 3 (2.5)                      | 1 (9.1)       | 0 (0.0)    | 0 (0.0)            |
| 2 hours or more                                             | 14 (2.1)   | 0 (0.0)               | 9 (2.6)                 | 0 (0.0)                         | 5 (4.2)                      | 0 (0.0)       | 0 (0.0)    | 0 (0.0)            |
| Unrestricted visiting hours                                 | 16 (2.4)   | 0 (0.0)               | 3 (0.9)                 | 1 (2.1)                         | 8 (6.8)                      | 2 (18.2)      | 1 (5.6)    | 1 (3.6)            |
| Visiting hours for patients with COVID-19 at time of survey | n=667      | n=100                 | n=344                   | n=48                            | n=118                        | n=11          | n=18       | n=28               |
| No in-person visiting                                       | 369 (55.3) | 82 (82.0)             | 180 (52.3)              | 27 (56.3)                       | 60 (50.8)                    | 4 (36.4)      | 7 (38.9)   | 9 (32.1)           |
| Less than 30 minutes                                        | 94 (14.1)  | 9 (9.0)               | 39 (11.3)               | 4 (8.3)                         | 26 (22.0)                    | 1 (9.1)       | 4 (22.2)   | 11 (39.3)          |
| 30 to 60 minutes                                            | 73 (10.9)  | 1 (1.0)               | 44 (12.8)               | 10 (20.8)                       | 8 (6.8)                      | 1 (9.1)       | 3 (16.7)   | 6 (21.4)           |
| 1 hour                                                      | 51 (7.6)   | 2 (2.0)               | 38 (11.0)               | 3 (6.3)                         | 6 (5.1)                      | 1 (9.1)       | 1 (5.6)    | 0 (0.0)            |
| 2 hours or more                                             | 51 (7.6)   | 3 (3.0)               | 31 (9.0)                | 3 (6.3)                         | 9 (7.6)                      | 2 (18.2)      | 2 (11.1)   | 1 (3.6)            |
| Unrestricted visiting hours                                 | 29 (4.3)   | 3 (3.0)               | 12 (3.5)                | 1 (2.1)                         | 9 (7.6)                      | 2 (18.2)      | 1 (5.6)    | 1 (3.6)            |

Table esup-2 cont'd

| Variable                                                       | Total      | East Asia and Pacific | Europe and Central Asia | Latin America and the Caribbean | Middle East and North Africa | North America | South Asia | Sub-Saharan Africa |
|----------------------------------------------------------------|------------|-----------------------|-------------------------|---------------------------------|------------------------------|---------------|------------|--------------------|
|                                                                | n (%)      | n (%)                 | n (%)                   | n (%)                           | n (%)                        | n (%)         | n (%)      | n (%)              |
| Visiting hours for patients without COVID-19 at peak           | n=664      | n=100                 | n=342                   | n=47                            | n=118                        | n=11          | n=18       | n=28               |
| Same as for COVID-19 patients                                  | 81 (12.2)  | 23 (23.0)             | 44 (12.9)               | 3 (6.4)                         | 6 (5.1)                      | 3 (27.3)      | 0 (0.0)    | 2 (7.1)            |
| No in-person visiting                                          | 366 (55.1) | 48 (48.0)             | 214 (62.6)              | 21 (44.7)                       | 56 (47.5)                    | 2 (18.2)      | 9 (50.0)   | 16 (57.1)          |
| Less than 30 minutes                                           | 82 (12.3)  | 15 (15.0)             | 33 (9.6)                | 3 (6.4)                         | 23 (19.5)                    | 0 (0.0)       | 4 (22.2)   | 4 (14.3)           |
| 30 to 60 minutes                                               | 34 (5.1)   | 1 (1.0)               | 10 (2.9)                | 7 (14.9)                        | 7 (5.9)                      | 3 (27.3)      | 3 (16.7)   | 3 (10.7)           |
| 1 hour                                                         | 31 (4.7)   | 4 (4.0)               | 14 (4.1)                | 7 (14.9)                        | 5 (4.2)                      | 1 (9.1)       | 0 (0.0)    | 0 (0.0)            |
| 2 hours or more                                                | 50 (7.5)   | 7 (7.0)               | 21 (6.1)                | 4 (8.5)                         | 13 (11.0)                    | 1 (9.1)       | 2 (11.1)   | 2 (7.1)            |
| Unrestricted visiting hours                                    | 20 (3.0)   | 2 (2.0)               | 6 (1.8)                 | 2 (4.3)                         | 8 (6.8)                      | 1 (9.1)       | 0 (0.0)    | 1 (3.6)            |
| Visiting hours for patients without COVID-19 at time of survey | n=667      | n=100                 | n=344                   | n=48                            | n=118                        | n=11          | n=18       | n=28               |
| Same as for COVID-19 patients                                  | 75 (11.2)  | 14 (14.0)             | 47 (13.7)               | 4 (8.3)                         | 5 (4.2)                      | 2 (18.2)      | 0 (0.0)    | 3 (10.7)           |
| No in-person visiting                                          | 176 (26.4) | 40 (40.0)             | 90 (26.2)               | 15 (31.3)                       | 25 (21.2)                    | 0 (0.0)       | 2 (11.1)   | 4 (14.3)           |
| Less than 30 minutes                                           | 142 (21.3) | 20 (20.0)             | 62 (18.0)               | 5 (10.4)                        | 42 (35.6)                    | 1 (9.1)       | 3 (16.7)   | 9 (32.1)           |
| 30 to 60 minutes                                               | 85 (12.7)  | 0 (0.0)               | 48 (14.0)               | 9 (18.8)                        | 14 (11.9)                    | 4 (36.4)      | 5 (27.8)   | 5 (17.9)           |
| 1 hour                                                         | 55 (8.2)   | 5 (5.0)               | 30 (8.7)                | 8 (16.7)                        | 6 (5.1)                      | 0 (0.0)       | 3 (16.7)   | 3 (10.7)           |
| 2 hours or more                                                | 97 (14.5)  | 8 (8.0)               | 55 (16.0)               | 7 (14.6)                        | 17 (14.4)                    | 3 (27.3)      | 4 (22.2)   | 3 (10.7)           |
| Unrestricted visiting hours                                    | 37 (5.5)   | 13 (13.0)             | 12 (3.5)                | 0 (0.0)                         | 9 (7.6)                      | 1 (9.1)       | 1 (5.6)    | 1 (3.6)            |

Table esup-3: Visitor policies in participating ICUs across geographical regions at time of survey

| Types of visitor policies                                                                    | Total    | East Asia and Pacific | Europe and Central Asia | Latin America and the Caribbean | Middle East and North Africa | North America | South Asia | Sub-Saharan Africa |
|----------------------------------------------------------------------------------------------|----------|-----------------------|-------------------------|---------------------------------|------------------------------|---------------|------------|--------------------|
|                                                                                              | n (%)    | n (%)                 | n (%)                   | n (%)                           | n (%)                        | n (%)         | n (%)      | n (%)              |
|                                                                                              | n=667    | n=100                 | n=344                   | n=48                            | n=118                        | n=11          | n=18       | n=28               |
| Do you have a written policy for visiting designed or revised to include COVID-19 specifics? |          |                       |                         |                                 |                              |               |            |                    |
| Yes                                                                                          | 447 (67) | 71 (71)               | 242 (70)                | 32 (67)                         | 63 (53)                      | 10 (91)       | 11 (61)    | 18 (64)            |
| No                                                                                           | 220 (33) | 29 (29)               | 102 (30)                | 16 (33)                         | 55 (47)                      | 1 (9)         | 7 (39)     | 10 (36)            |
| Is there a government mandated visiting policy currently?                                    |          |                       |                         |                                 |                              |               |            |                    |
| No, there are No government mandated restrictions in place                                   | 313 (47) | 64 (64)               | 133 (39)                | 29 (60)                         | 58 (49)                      | 7 (64)        | 9 (50)     | 13 (46)            |
| Yes, but our ICU has its own policy                                                          | 157 (24) | 12 (12)               | 93 (27)                 | 10 (21)                         | 27 (23)                      | 2 (18)        | 7 (39)     | 6 (21)             |
| Yes, and our ICU follows the policy                                                          | 197 (30) | 24 (24)               | 118 (34)                | 9 (19)                          | 33 (28)                      | 2 (18)        | 2 (11)     | 9 (32)             |
| Is there a COVID-19 related hospital visiting policy for the hospital wards                  |          |                       |                         |                                 |                              |               |            |                    |
| No, the hospital does not restrict visiting for the wards                                    | 71 (11)  | 4 (4)                 | 18 (5)                  | 4 (8)                           | 27 (30)                      | 4 (36)        | 3 (17)     | 11 (39)            |
| Visiting policies in the wards are variable and different for each ward of our hospital      | 90 (13)  | 5 (5)                 | 36 (10)                 | 8 (17)                          | 27 (30)                      | 1 (9)         | 7 (39)     | 6 (21)             |
| Yes, and our ICU follows the same policy                                                     | 289 (43) | 69 (69)               | 151 (44)                | 15 (31)                         | 37 (31)                      | 3 (27)        | 6 (33)     | 8 (29)             |
| Yes, and our ICU is more restrictive than hospital policy                                    | 112 (17) | 16 (16)               | 50 (15)                 | 17 (35)                         | 24 (20)                      | 1 (9.1)       | 2 (11)     | 2 (7)              |
| Yes, and our ICU is less restrictive than the hospital policy                                | 105 (16) | 6 (6)                 | 89 (26)                 | 4 (8)                           | 3 (3)                        | 2 (18)        | 0 (0)      | 1 (4)              |

Table esup-3 cont'd

| Types of visitor policies                                                     | Total    | East Asia and Pacific | Europe and Central Asia | Latin America and the Caribbean | Middle East and North Africa | North America | South Asia | Sub-Saharan Africa |
|-------------------------------------------------------------------------------|----------|-----------------------|-------------------------|---------------------------------|------------------------------|---------------|------------|--------------------|
|                                                                               | n (%)    | n (%)                 | n (%)                   | n (%)                           | n (%)                        | n (%)         | n (%)      | n (%)              |
| Can the ICU visiting policy be changed for specific patients or situations?   |          |                       |                         |                                 |                              |               |            |                    |
| Not relevant - no specific policy                                             | 46 (7)   | 0 (0)                 | 20 (6)                  | 4 (8)                           | 18 (15)                      | 0 (0)         | 3 (17)     | 1 (4)              |
| It requires a written request from the relatives                              | 53 (8)   | 2 (2)                 | 28 (8)                  | 4 (8)                           | 14 (12)                      | 0 (0)         | 2 (11)     | 3 (11)             |
| The bedside nurse can make the decision                                       | 60 (9)   | 0 (0)                 | 33 (10)                 | 11 (23)                         | 11 (9)                       | 2 (18)        | 1 (6)      | 2 (7)              |
| The doctor can make the decision                                              | 300 (45) | 44 (44)               | 175 (50)                | 32 (67)                         | 34 (29)                      | 2 (18)        | 4 (22)     | 9 (32)             |
| The director of the ICU can make the decision                                 | 292 (44) | 33 (33)               | 163 (47)                | 27 (56)                         | 35 (30)                      | 6 (55)        | 9 (50)     | 19 (68)            |
| The nursing director of the ICU can make the decision                         | 114 (17) | 24 (24)               | 57 (17)                 | 10 (21)                         | 17 (14)                      | 3 (27)        | 1 (6)      | 2 (7)              |
| Hospital hierarchy can make the decision                                      | 130 (19) | 26 (26)               | 58 (17)                 | 9 (19)                          | 23 (19)                      | 7 (64)        | 2 (11)     | 5 (18)             |
| It requires approval at a higher level                                        | 21 (3)   | 5 (5)                 | 3 (1)                   | 1 (2)                           | 11 (9)                       | 0 (0.0)       | 1 (6)      | 0 (0)              |
| The ICU visiting policy cannot be changed for specific situations or patients | 74 (11)  | 8 (8)                 | 30 (9)                  | 2 (4)                           | 31 (26)                      | 0 (0.0)       | 3 (17)     | 0 (0)              |
| Estimated % difference between set policy and what is offered to relatives    | n=590    | n=94                  | n=300                   | n=46                            | n=99                         | n=10          | n=15       | n=26               |
| 0                                                                             | 99 (17)  | 26 (28)               | 46 (15)                 | 5 (11)                          | 18 (18)                      | 1 (10)        | 2 (13)     | 1 (4)              |
| 1 to 9                                                                        | 106 (18) | 21 (22)               | 56 (19)                 | 6 (13)                          | 14 (14)                      | 0 (0)         | 3 (20)     | 6 (23)             |
| 10 to 24                                                                      | 202 (34) | 32 (34)               | 102 (34)                | 22 (48)                         | 25 (25)                      | 4 (40)        | 9 (60)     | 8 (31)             |
| 25 to 49                                                                      | 95 (16)  | 6 (6)                 | 57 (19)                 | 8 (17)                          | 19 (19)                      | 0 (0)         | 0 (0)      | 5 (19)             |
| 50 or more                                                                    | 88 (15)  | 9 (10)                | 39 (13)                 | 5 (11)                          | 23 (23)                      | 5 (50)        | 1 (7)      | 6 (23)             |



Table esup-4: Communication and support for relatives across geographical regions at time of survey

| <b>Family support</b>                                                                                | <b>Total</b> | <b>East Asia and Pacific</b> | <b>Europe and Central Asia</b> | <b>Latin America and the Caribbean</b> | <b>Middle East and North Africa</b> | <b>North America</b> | <b>South Asia</b> | <b>Sub-Saharan Africa</b> |
|------------------------------------------------------------------------------------------------------|--------------|------------------------------|--------------------------------|----------------------------------------|-------------------------------------|----------------------|-------------------|---------------------------|
|                                                                                                      | n (%)        | n (%)                        | n (%)                          | n (%)                                  | n (%)                               | n (%)                | n (%)             | n (%)                     |
| ICU information booklet contains information on COVID-19                                             | n=667        | n=100                        | n=344                          | n=48                                   | n=118                               | n=11                 | n=18              | n=28                      |
| Not available                                                                                        | 382 (57)     | 57 (57)                      | 206 (60)                       | 27 (56)                                | 65 (55)                             | 3 (27)               | 9 (50)            | 15 (54)                   |
| Digital format only                                                                                  | 122 (18)     | 18 (18)                      | 72 (21)                        | 6 (13)                                 | 13 (11)                             | 8 (73)               | 5 (28)            | 0 (0)                     |
| Physical format (booklet)                                                                            | 122 (18)     | 18 (18)                      | 44 (13)                        | 11 (23)                                | 33 (28)                             | 0 (0)                | 3 (17)            | 13 (46)                   |
| Both (digital + physical formats)                                                                    | 41 (6)       | 7 (7)                        | 22 (6)                         | 4 (8)                                  | 7 (6)                               | 0 (0)                | 1 (6)             | 0 (0)                     |
| Mode of delivery of general or daily updates <sup>a</sup>                                            | n=646        | n=96                         | n=338                          | n=48                                   | n=107                               | n=11                 | n=18              | n=28                      |
| In person at bedside (within visiting restrictions)                                                  | 143 (22)     | 20 (21)                      | 79 (23)                        | 6 (13)                                 | 22 (21)                             | 7 (64)               | 3 (17)            | 6 (21)                    |
| In person, but outside the ICU clinical area.                                                        | 230 (36)     | 43 (45)                      | 93 (28)                        | 10 (21)                                | 50 (47)                             | 0 (0)                | 12 (67)           | 22 (79)                   |
| In person, but outside of the hospital and outdoors                                                  | 26 (4)       | 3 (3)                        | 5 (2)                          | 2 (4)                                  | 16 (15)                             | 0 (0)                | 0 (0)             | 0 (0)                     |
| On the phone, on family's request                                                                    | 279 (43)     | 63 (66)                      | 140 (41)                       | 12 (25)                                | 48 (45)                             | 9 (82)               | 4 (22)            | 3 (11)                    |
| On the phone, families called at regular intervals by ICU staff                                      | 353 (55)     | 38 (40)                      | 243 (72)                       | 37 (77)                                | 25 (23)                             | 4 (36)               | 3 (17)            | 3 (11)                    |
| Via virtual/video-conferences                                                                        | 130 (20)     | 24 (25)                      | 85 (25)                        | 10 (21)                                | 5 (5)                               | 4 (36)               | 2 (11)            | 0 (0)                     |
| Formal meetings or discussions regarding prognosis, treatment plans or end of life care <sup>a</sup> | n=615        | n=97                         | n=322                          | n=47                                   | n=93                                | n=11                 | n=18              | n=27                      |
| In person in the same place as before COVID-19                                                       | 230 (37)     | 44 (45)                      | 137 (43)                       | 13 (28)                                | 23 (25)                             | 6 (55)               | 3 (17)            | 4 (15)                    |
| In person but in an area dedicated to meetings setup since COVID-19                                  | 176 (29)     | 28 (29)                      | 67 (21)                        | 13 (28)                                | 36 (39)                             | 2 (18)               | 12 (67)           | 18 (67)                   |
| Outside of the building, outdoors                                                                    | 36 (6)       | 2 (2)                        | 12 (4)                         | 1 (2)                                  | 13 (14)                             | 0 (0)                | 2 (11)            | 6 (22)                    |
| Via video-conference                                                                                 | 103 (17)     | 21 (22)                      | 53 (17)                        | 13 (28)                                | 6 (7)                               | 5 (46)               | 5 (28)            | 0 (0)                     |
| Over the phone                                                                                       | 306 (50)     | 48 (50)                      | 184 (57)                       | 23 (49)                                | 35 (38)                             | 9 (82)               | 4 (22)            | 3 (11)                    |

Footnotes: a % figures do not sum up to 100 as participants could select multiple options

Table esup-4 cont'd

| <b>Family support</b>                                                                | <b>Total</b> | <b>East Asia and Pacific</b> | <b>Europe and Central Asia</b> | <b>Latin America and the Caribbean</b> | <b>Middle East and North Africa</b> | <b>North America</b> | <b>South Asia</b> | <b>Sub-Saharan Africa</b> |
|--------------------------------------------------------------------------------------|--------------|------------------------------|--------------------------------|----------------------------------------|-------------------------------------|----------------------|-------------------|---------------------------|
| Virtual / video visiting                                                             | n=667        | n=100                        | n=344                          | n=48                                   | n=118                               | n=11                 | n=18              | n=28                      |
| Is not available                                                                     | 249 (37)     | 32 (32)                      | 92 (27)                        | 9 (19)                                 | 88 (75)                             | 0 (0)                | 10 (56)           | 18 (64)                   |
| Is available, but use is not protocolized                                            | 326 (50)     | 50 (50)                      | 205 (60)                       | 22 (46)                                | 25 (21)                             | 10 (91)              | 5 (28)            | 9 (32)                    |
| Is available, and use is protocolized                                                | 92 (14)      | 18 (18)                      | 47 (14)                        | 17 (35)                                | 5 (4)                               | 1 (9)                | 3 (17)            | 1 (4)                     |
| Which devices are used for virtual visiting? <sup>a</sup>                            | n=418        | n=68                         | n=252                          | n=39                                   | n=30                                | n=11                 | n=8               | n=10                      |
| Personal devices provided by staff members                                           | 102 (24)     | 12 (18)                      | 53 (21)                        | 16 (41)                                | 9 (30)                              | 4 (36)               | 2 (25)            | 6 (60)                    |
| Personal devices provided by patients or their relatives                             | 180 (43)     | 30 (44)                      | 104 (41)                       | 9 (23)                                 | 18 (60)                             | 7 (64)               | 4 (50)            | 8 (80)                    |
| Computers that are also used for patient care/clinical information systems           | 30 (7)       | 9 (13)                       | 14 (6)                         | 1 (3)                                  | 4 (13)                              | 0 (0)                | 2 (25)            | 0 (0)                     |
| Devices dedicated to virtual visiting and not used for something else                | 279 (67)     | 35 (52)                      | 198 (79)                       | 21 (54)                                | 7 (23)                              | 11 (100)             | 6 (75)            | 1 (10)                    |
| Devices usually dedicated to virtual clinical rounds repurposed for virtual visiting | 31 (7)       | 15 (22)                      | 9 (4)                          | 3 (8)                                  | 1 (3)                               | 0 (0)                | 2 (25)            | 1 (10)                    |
| How is virtual visiting organized? <sup>a</sup>                                      | n=402        | n=65                         | n=246                          | n=39                                   | n=25                                | n=11                 | n=7               | n=9                       |
| Staff organized appointments offered to relatives on a regular basis                 | 138 (34)     | 12 (19)                      | 93 (38)                        | 20 (51)                                | 7 (28)                              | 2 (18)               | 2 (29)            | 2 (22)                    |
| Staff organized appointments when requested by the doctor or nurse                   | 153 (38)     | 32 (49)                      | 90 (37)                        | 16 (41)                                | 5 (20)                              | 6 (55)               | 2 (29)            | 2 (22)                    |
| Appointments organized when requested by relatives                                   | 223 (55)     | 37 (57)                      | 134 (55)                       | 18 (46)                                | 15 (60)                             | 10 (91)              | 3 (43)            | 6 (67)                    |
| Virtual visiting initiated on request from a relative or patient (no appointment)    | 176 (44)     | 65 (100)                     | 246 (100)                      | 39 (100)                               | 25 (100)                            | 11 (100)             | 7 (100)           | 9 (100)                   |
| How frequently do you use virtual visiting?                                          | n=418        | n=68                         | n=252                          | n=39                                   | n=30                                | n=11                 | n=8               | n=10                      |
| Daily or almost daily for most patients                                              | 111 (27)     | 8 (12)                       | 73 (29)                        | 15 (39)                                | 5 (17)                              | 3 (27)               | 5 (63)            | 2 (20)                    |
| Several times per week for most patients                                             | 126 (30)     | 19 (28)                      | 73 (29)                        | 7 (18)                                 | 15 (50)                             | 6 (55)               | 1 (13)            | 5 (50)                    |
| Not more than once a week for most patients                                          | 47 (11)      | 7 (10)                       | 27 (11)                        | 7 (18)                                 | 4 (13)                              | 1 (9)                | 0 (0)             | 1 (10)                    |
| Infrequently, only for a few patients                                                | 5 (20)       | 4 (20)                       | 3 (20)                         | 2 (20)                                 | 1 (20)                              | 0 (20)               | 1 (20)            | 2 (20)                    |
| Never                                                                                | 6 (1)        | 1 (1.5%)                     | 2 (1)                          | 0 (0)                                  | 2 (7)                               | 0 (0)                | 1 (13)            | 0 (0)                     |

Footnotes: a % figures do not sum up to 100 as participants could select multiple options

| Number of representative ICUs per geographical region and country |     |                                               |    |
|-------------------------------------------------------------------|-----|-----------------------------------------------|----|
| <b>East Asia &amp; Pacific (100)</b>                              |     | <b>Latin America &amp; the Caribbean (48)</b> |    |
| Australia                                                         | 21  | Argentina                                     | 4  |
| China                                                             | 2   | Brazil                                        | 33 |
| Indonesia                                                         | 3   | Colombia                                      | 1  |
| Japan                                                             | 60  | Costa Rica                                    | 1  |
| Malaysia                                                          | 7   | Ecuador                                       | 1  |
| New Zealand                                                       | 1   | Mexico                                        | 5  |
| Philippines                                                       | 2   | Paraguay                                      | 2  |
| Taiwan                                                            | 3   | Uruguay                                       | 1  |
| Thailand                                                          | 1   | <b>Middle East &amp; North Africa (118)</b>   |    |
| <b>Europe &amp; Central Asia (344)</b>                            |     | Bahrain                                       | 1  |
| Andorra                                                           | 1   | Egypt                                         | 45 |
| Austria                                                           | 5   | Iran                                          | 11 |
| Belgium                                                           | 15  | Iraq                                          | 8  |
| Bosnia and Herzegovina                                            | 7   | Israel                                        | 4  |
| Bulgaria                                                          | 1   | Jordan                                        | 22 |
| Croatia                                                           | 3   | Lebanon                                       | 7  |
| Denmark                                                           | 1   | Libya                                         | 10 |
| Estonia                                                           | 1   | Morocco                                       | 3  |
| Finland                                                           | 1   | Saudi Arabia                                  | 1  |
| France                                                            | 32  | Syria                                         | 1  |
| Germany                                                           | 7   | Tunisia                                       | 1  |
| Greece                                                            | 17  | United Arab Emirates                          | 1  |
| Italy                                                             | 118 | Yemen                                         | 3  |
| Kazakhstan                                                        | 3   | <b>North America (11)</b>                     |    |
| Lithuania                                                         | 1   | Canada                                        | 9  |
| Netherlands                                                       | 6   | United States of America                      | 2  |
| Poland                                                            | 1   | <b>South Asia (18)</b>                        |    |
| Portugal                                                          | 8   | Bangladesh                                    | 1  |
| Romania                                                           | 26  | India                                         | 8  |
| Russia                                                            | 6   | Pakistan                                      | 8  |
| Slovenia                                                          | 1   | Sri Lanka                                     | 1  |
| Spain                                                             | 49  | <b>Sub-Saharan Africa (28)</b>                |    |
| Sweden                                                            | 2   | Ghana                                         | 2  |
| Switzerland                                                       | 6   | Namibia                                       | 1  |
| Turkey                                                            | 8   | Nigeria                                       | 9  |
| United Kingdom                                                    | 18  | Sudan                                         | 16 |

Figure esup-2 map of participating countries

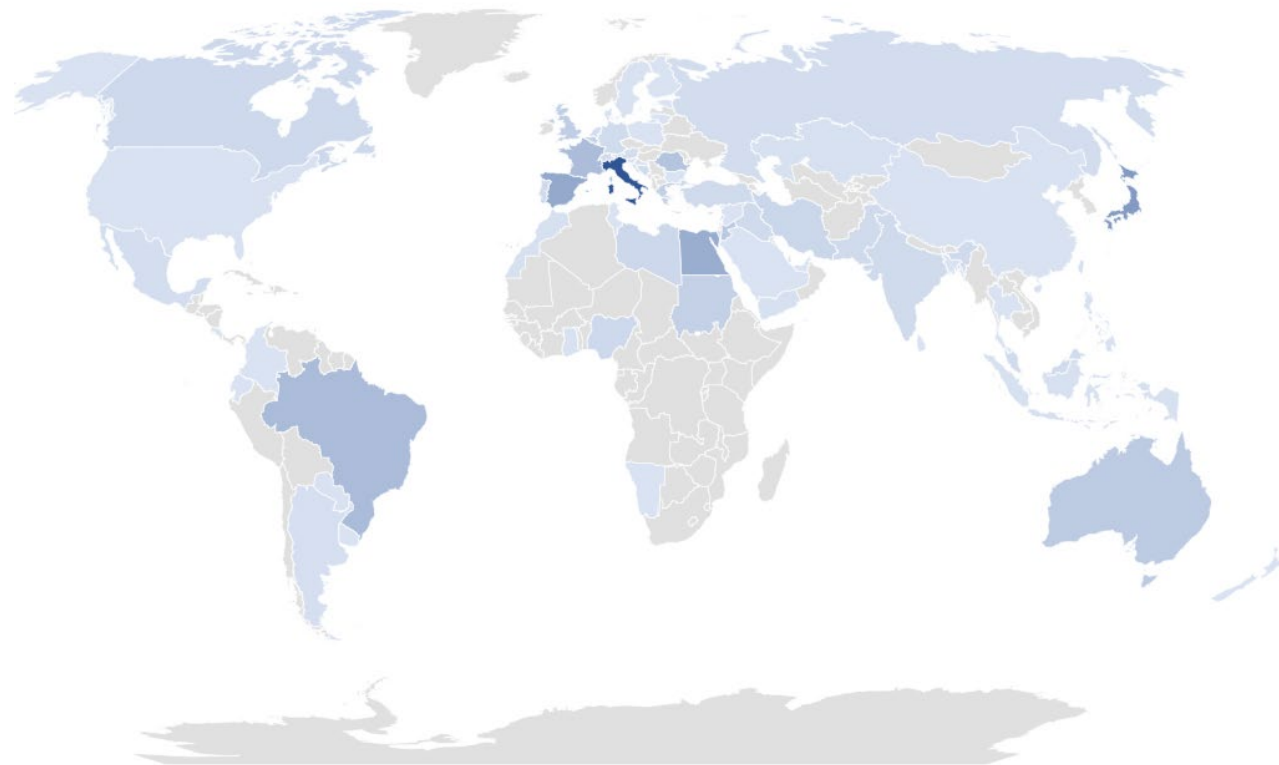

## Data collection tool

Welcome to the COVSIT survey.

Closing ICUs to visitors, either as a blanket rule, or by drastically reducing the number and duration of visits has been used in multiple countries and to various degrees. Most often out of the necessity to protect the patients, their relatives, and an already overstretched health care system.

Multiple reports have described the traumatic separation caused by the inability to visit critically ill loved ones' and the incredible grief of being separated at end of life.

We, as an international group of ICU nurses and doctors, have designed this survey to understand how the COVID-19 pandemic has affected visiting of ICU patients by their relatives and what mitigation strategies may be in place. (click here to access the protocol)

We are seeking one answer only for each ICU. Ideally completed by a senior nurse or doctor that is aware of previous and current visiting policies. *Please discuss with your colleagues to ensure this is done only once.*

We refer to relatives or ICU patients as persons defined by the patient as family, friends, neighbours, relatives, and/or support persons.

The survey investigates 4 core domains:

1. A description of your ICU, including bed availability, staffing and when was the peak of COVID-19 related restrictions to visiting for you (if applicable).
2. Are relatives of ICU patients allowed at the bedside, and if yes for how long?
3. Have you been using videoconferencing or technology to facilitate virtual visiting by relatives of ICU patients?
4. How do you maintain communication with and information to the relatives?

COVISIT has been reviewed as a low and negligible risk project by the Ethics committee of the Royal Brisbane and women's hospital in Australia (LNR/2020/QRBW/71880) and is endorsed by the research committee of the European Society of Intensive Care Medicine.

**The survey is translated and available in English, Italian, French, Japanese and Spanish languages**, please look for the link at the top right of this page if you wish to change the language.

**It will take you 10 to 15 minutes to complete the survey. Please use a computer rather than a phone to record your responses.**

The survey is available to departments that define themselves as Intensive Care Units. Usually ICUs provide advance monitoring and organ supportive therapy to critically ill patients. We welcome responses from all departments that treat or do not treat COVID-19 patients

**Please click here to complete the survey**

Data collection tool

**Text in navy blue is not to be displayed and only a guide to build the online data tool.**

*It is important that we collect one answer for each ICU. Please discuss with your colleagues to ensure this is done only once.*

*The first 5 questions allow to identify the ICU and remove eventual duplicates. They will be deleted from the database after this step has been completed and prior to analysis. Country information will be kept and analysed as part of the results.*

**If there are several ICUs with different rules, eg a COVID-19 and a non COVID-19 ICU, please complete the survey several times, one for each ICU**

Part 1 – identification of the ICU.

Please identify your role in the ICU as this will help us ensuring there is only one answer per ICU

**Q1. ROLE** *(will be deleted before analysis)*

(one possible answer)

- a) Medical director
- b) Medical senior role
- c) Nursing Senior or non clinical role
- d) Nursing Clinical role
- e) Medical other
- f) Nursing other
- g) Administrative role
- h) Other

**Q2.COUNTRY** *(will be reported as part of the results)*

(list/dropdown)

**Q3.Town** *(will be deleted before analysis)*

(textfield)

**Q4. Name of hospital** *(will be deleted before analysis)*

(textfield)

**Q5. Name of the ICU** *(will be deleted before analysis)*

Only if more than 1 ICU in the hospital, this will be used to avoid duplicates

(textfield)

**Data from the following questions will be analysed and reported as the results of the survey.**

**Q6. Type of Hospital**

*(one possible answer)*

- a) Large tertiary teaching hospital, including university hospitals
- b) Community based urban hospital
- c) Remote / regional hospital

**Q7. Funding of the hospital**

*(multiple possible answers, tickboxes)*

*Please tick at least one box.*

- a) Private for-profit hospital
- b) Private not-for profit hospital
- c) Public hospital

**Q8. Number of acute care beds in the hospital (Currently)**

*(this is the total number of beds in the hospital, including all specialties of medicine, surgery and critical care, but not long term rehabilitation or nursing home beds.)*

The following questions ask

1- Is this a Pre-existing ICU or a new ICU

2- when was the peak of COVID-19

With responses we will redirect to a page asking data from before the pandemic, at the peak of the pandemic and currently according to their answers. We will only show what is relevant to the respondent.

Page 2 – Status of the ICU

**Q9. Type of ICU**

Please read carefully as your choice will determine which questions we ask you later in the survey  
(one possible answer, dropdown please)

- a) ICU pre-existing to the pandemic and CURRENTLY not managing COVID-19 patients
- b) ICU pre-existing to the pandemic and CURRENTLY fully dedicated to COVID-19 patients
- c) ICU pre-existing to the pandemic and CURRENTLY managing mixed COVID-19 and non-COVID-19 patients
- d) New ICU (built specifically for the pandemic) and CURRENTLY not managing COVID-19 patients.
- e) New ICU (built specifically for the pandemic) fully dedicated to COVID-19 patients
- f) New ICU (built specifically for the pandemic) and managing mixed COVID-19 and/or non-COVID-19 patients

**Page 3 – Timeline**

**Q10. Timeline: When was the peak of COVID-19 for your ICU ?**

*(if your ICU has not admitted any COVID-19 patients during the pandemic, please select the month where visiting restriction where at the highest, if not applicable, select NOW.)*

(select with list of months from Jan 2020 to March 2021, plus one option on top that says: NOW)

**Q11. Characteristics of the ICU**

**please read these instructions carefully:**

- **Before the COVID-19 pandemic:** to describe your ICU at baseline, before any restrictions to visiting or change in organisation due to COVID-19. Please enter values for December 2019.
- **At the peak of the pandemic** – When you had the highest number of COVID-19 patients in your ICU.
- **Currently** – use this to describe the current situation. If you are at the peak occupancy indicate it here.

|                                                      | (column 2)<br>At the Peak of COVID-19 | (column 3)<br>Currently |
|------------------------------------------------------|---------------------------------------|-------------------------|
| Caseload: % of the patients in the ICU with COVID-19 |                                       |                         |

**Q12. Capacity of the ICU**

|                                                      | (column 1)<br>Before COVID-19<br>(December 2019) | (column 2)<br>At the Peak of<br>COVID-19 | (column 3)<br>Currently |
|------------------------------------------------------|--------------------------------------------------|------------------------------------------|-------------------------|
| <b>a. Total number of ICU beds (actual capacity)</b> |                                                  |                                          |                         |

**Q13 Staffing of the ICU**

|                                                             | (column 1)<br>Before COVID-19<br>(December 2019) | (column 2)<br>At the Peak of<br>COVID-19 | (column 3)<br>Currently |
|-------------------------------------------------------------|--------------------------------------------------|------------------------------------------|-------------------------|
| c. Nurse patient ratio: 1 nurse cares for... patients       |                                                  |                                          |                         |
| c. Senior Doctor patient ratio: 1 Dr. cares for... patients |                                                  |                                          |                         |
| d. Junior Doctor patient ratio: 1 Dr. cares for... patients |                                                  |                                          |                         |

**Q14. Routine in-person Visiting conditions for ICU patients with COVID-19.**

*Please let us know if physical persons are allowed at the bedside of the patient, or if they can only view their relatives through a window or if there are no visitors in the ICU or no visitors in the hospital.*

|                                                                              |                                                                                                                                                                              |                         |
|------------------------------------------------------------------------------|------------------------------------------------------------------------------------------------------------------------------------------------------------------------------|-------------------------|
|                                                                              | (column 2)<br>At the Peak of COVID-19                                                                                                                                        | (column 3)<br>Currently |
| Response items may be changed but can't become longer than what they are now | <ul style="list-style-type: none"> <li>- At the bedside</li> <li>- View through a window</li> <li>- No visitors in the ICU</li> <li>- No visitors in the Hospital</li> </ul> |                         |

**Q15. In-person Visiting hours per day, at the bedside, for ICU patients with COVID-19**

|  | At the Peak of COVID-19                                                                                                                                                                                                                                       | Currently |
|--|---------------------------------------------------------------------------------------------------------------------------------------------------------------------------------------------------------------------------------------------------------------|-----------|
|  | <ul style="list-style-type: none"> <li>- Unrestricted visiting hours</li> <li>- No in-person visiting</li> <li>- less than 30 minutes</li> <li>- 30 to 60 minutes</li> <li>- 1 hour</li> <li>- 2 hours</li> <li>- 3 hours</li> <li>- Etc up to 24h</li> </ul> |           |

**Q16. Specific reasons where visiting policies for patients with COVID-19 may be different and more liberal**

Please chose the reasons why visitors may be allowed or allowed for longer time periods despite restrictions.

|                                      |  | At the Peak of COVID-19         | Currently |
|--------------------------------------|--|---------------------------------|-----------|
| New admission                        |  |                                 |           |
| Clinical deterioration               |  |                                 |           |
| End of Life                          |  | Increased Visiting<br>No change |           |
| Conscious patient                    |  |                                 |           |
| On family request                    |  |                                 |           |
| When no longer considered contagious |  |                                 |           |
| Other                                |  |                                 |           |

**Q17. is the visiting policy different for patients WITHOUT COVID-19**

*If visiting policies are different for patients with and without COVID-19, please enter how many hours per day visitors are allowed at the bedside of patients without COVID-19*

|                                               |                                       |                         |
|-----------------------------------------------|---------------------------------------|-------------------------|
| (column 1)<br>Before COVID-19 (December 2019) | (column 2)<br>At the Peak of COVID-19 | (column 3)<br>Currently |
|-----------------------------------------------|---------------------------------------|-------------------------|



|  |                                                                                                                                                                                                                                                                                                   |      |
|--|---------------------------------------------------------------------------------------------------------------------------------------------------------------------------------------------------------------------------------------------------------------------------------------------------|------|
|  | <ul style="list-style-type: none"> <li>- Same as for COVID-19 pts</li> <li>- Unrestricted visiting hours</li> <li>- No in-person visiting</li> <li>- less than 30 minutes</li> <li>- 30 to 60 minutes</li> <li>- 1 hour</li> <li>- 2 hours</li> <li>- 3 hours</li> <li>- Etc up to 24h</li> </ul> | same |
|--|---------------------------------------------------------------------------------------------------------------------------------------------------------------------------------------------------------------------------------------------------------------------------------------------------|------|

From here, for simplicity, we will only ask the questions as of NOW/CURRENTLY.

### Page 9 Visiting Policies for ICU patients

From this point of the survey, please answer to **describe your current situation. As of today.**

**Q18. Do you have a WRITTEN policy for visiting that was designed or revised to include COVID-19 specifics ?**  
(one possible answer, dropdown menu)

- NO
- YES

**Q19. Is there a government mandated visiting policy currently (city, state or country restrictions to hospital or ICU visiting due to COVID-19).** (one possible answer, dropdown menu)

- NO, there are NO government mandated restrictions in place.
- Yes, the government restricts visiting in hospitals, our ICU has its own policy.
- Yes, the government restricts visiting in hospitals and our ICU follows the policy.

**Q20 Is there a COVID-19 related hospital visiting policy for the hospital wards (above the government policy, if any)?** (one possible answer, dropdown menu)

- NO, the hospital does not restrict visiting for the wards.
- Visiting policies in the wards are variable and different for each ward of our hospital
- Yes, the hospital restricts visiting for the wards, and our ICU follows the same policy.
- Yes, the hospital restricts visiting for the wards, and our ICU IS MORE restrictive than the hospital policy.
- Yes, the hospital restricts visiting for the wards, but our ICU IS LESS restrictive than the hospital policy.

**Q21 Can the ICU visiting policy be changed for specific patients or situations?**

*(eg, End of life, family request, compassionate grounds, if not clearly specified in the policy)*

*(multiple possible answers, use checkboxes)*

- Not relevant, we don't have a specific policy during the pandemic
- Yes, it requires written request from the relatives
- Yes, the bedside nurse can make the decision
- Yes, the doctor can make the decision
- Yes, the director of the ICU can make the decision
- Yes, the nursing director of the ICU can make the decision
- Yes, hospital hierarchy can make the decision
- Yes, requires approval at a higher level (eg ministerial)
- No, ICU visiting policy cannot be changed for any specific situation or patients

**Q22 Please estimate the variability between the set policy you have described and what is offered to relatives of ICU patients:**

*Please enter an estimated percentage (%) cases for which visiting has been more liberal than the set policy and relatives were allowed at the bedside more often or for longer periods.*

-----Textfield, allow numbers up to 100 -----

**Page 10 communication with relatives of ICU patients**

*These questions refer to the current organisation of your ICU*

**Q23 COVID-19 ICU Information booklet**

*Do you have an information booklet or webpage with information on COVID-19, visiting and PPE for relatives of ICU patients? (multiple possible answers)*

- a) No
- b) Yes, electronic format (webpage or similar)
- c) Yes, physical booklet

**Q24. General or daily updates**

*This refers to general updates on the status of the patient, please refer to what has been happening in the days prior to answering the survey. (multiple possible answers)*

- a) Updates are given in person at the BEDSIDE (within the limits of visiting)
- b) Updates are given in person, but OUTSIDE of the CLINICAL AREA OF the ICU.
- c) Updates are given in person, but OUTSIDE of the HOSPITAL and OUTDOORS.
- d) Updates are given on the phone, on family's request
- e) Updates are given on the phone; families are called at regular intervals by ICU staff
- f) Updates are given via virtual/video-conferences.
- g) Not applicable

**Q25. Formal meetings or discussions regarding prognosis, treatment plans or End Of Life**

*(multiple possible answers)*

- a) Family meetings are held in person in the same place as before COVID-19
- b) Family meetings are held in person but in an area dedicated to meetings setup since COVID-19
- c) Family meetings are held OUTSIDE of THE BUILDING, OUTDOORS
- d) Family meetings are held via VIDEO CONFERENCE.
- e) Family meetings are held over the PHONE.
- f) Not applicable

**Q26. Do you use virtual / video visiting in your ICU.**

*Do you offer the possibility for relatives of ICU patients to use Video-conferencing or Video-chat to virtually visit their family members when in-person visiting is not possible?*

*(branching : if YES > send to q26 Which devices, if NO > send to Q30)*

- No, virtual visiting is not available.
- Yes, virtual visiting is available, but its use is NOT protocolized.
- Yes, virtual visiting is available, and its use IS protocolized.

**Q27. Which devices are used for virtual visiting**

*(multiple possible answers)*

- Personal devices provided by staff members.
- Personal devices provided by patients or their relatives.
- Computers that are also used for patient care / clinical information systems

- Devices dedicated to virtual visiting (eg Tablets, computers) in the ICU (not used for something else)
- Devices usually dedicated to virtual clinical rounds repurposed for virtual visiting
- Not applicable

**Q28. How is virtual visiting organized?**

*(multiple possible answers)*

- Appointments Organized by the staff are offered to the relatives on a regular basis
- Appointments Organized by the staff when requested by the doctor or the nurse
- Appointments Organized when requested by the relatives
- Virtual visiting can be initiated on request from a relative or the patient (no appointment).
- Not applicable

**Q29. How frequently do you use virtual visiting?**

*(One possible answer)*

- Daily or almost daily for most patients
- Several times per week for most patients
- Not more than once a week for most patients
- Infrequently, only for a few patients
- Never

**Q30 Please rank the following reasons why relatives did not or could not visit their loved ones in ICU while visiting was in theory possible.**

*Please tick how frequently relatives have not visited for each potential reason below. You may use the textbox of the following question to give some details if you wish.*

*5 point Likert scale matrix (never/rarely/at least once a week/at least once a day/not applicable)*

- Fear from catching COVID-19
- Own COVID-19 illness
- Fear from disturbing clinical care
- Fear from being overwhelmed by ICU
- Inability to travel due to lockdown
- Inability to enter the hospital

**Q31: Would you please share with the investigators your perspectives/ experience with caring for families of COVID 19 patients?**

**Q32. Do you certify this data to be complete and accurate and would you like your response to be recorded.**

- a) yes, my response is complete and accurate and should be recorded
- b) no, I was just testing the survey, do not record my response
- c) no, do not record this response (other reasons)
